# Supplementary material for: A mechanistic evaluation of human beta defensin 2 mediated protection of human skin barrier in vitro
Source: PubMed Central journal article supplement (PMC9908873; doi:10.1038/s41598-023-29558-0), 2023-02-08
Supplement: 41598_2023_29558_MOESM1_ESM.pdf [file 41598_2023_29558_MOESM1_ESM.pdf]

**Human Beta Defensin-2-mediated protection of human skin barrier *in vitro*; a mechanistic evaluation.**

<sup>1</sup>Jennifer R. Shelley\*, <sup>1</sup>Brian J. McHugh, <sup>2</sup>Jimi Wills, <sup>1</sup>Julia R. Dorin, <sup>1</sup>Richard Weller, <sup>3</sup>David J. Clarke, <sup>1</sup>Donald J. Davidson

<sup>1</sup> University of Edinburgh Centre for Inflammation Research, Queen's Medical Research Institute, BioQuarter, 47 Little France Crescent, University of Edinburgh, EH16 4TJ, Scotland, UK.

<sup>2</sup> Cancer Research UK Edinburgh Centre, Institute of Genetics and Cancer, The University of Edinburgh, Western General Hospital Campus, Crewe Road, Edinburgh, EH4 2XU, Scotland, UK.

<sup>3</sup> The EastChem School of Chemistry, University of Edinburgh, Joseph Black Building, Brewster Road, Edinburgh, EH9 3FJ, UK.

\* Corresponding author

Corresponding author – current contact details

Dr Jennifer R. Shelley

Address: The Commonwealth Building, The Hammersmith Hospital, Du Cane Road, London, W12 0NN

E-mail: [jennifer.shelley@imperial.ac.uk](mailto:jennifer.shelley@imperial.ac.uk)

Phone: 02075895111



| Peptide    | Sequence                                                                                                                           | Theoretical average neutral mass (reduced) / Da | Theoretical average neutral mass (oxidised) / Da | Observed average neutral mass according to LC-MS / Da |
|------------|------------------------------------------------------------------------------------------------------------------------------------|-------------------------------------------------|--------------------------------------------------|-------------------------------------------------------|
| Synthetic  | GIGDPVT <b>C</b> LKSGAI <b>C</b> HPVF <b>C</b> PR<br>RYKQIGT <b>C</b> GLPGTK <b>C</b> C <b>K</b> KP                                | 4334.2                                          | 4328.2                                           | 4328.8                                                |
| Scrambled  | IGKILK <b>H</b> VGLSGY <b>C</b> KG <b>D</b> <b>C</b> TRGP<br><b>C</b> GP <b>F</b> VIT <b>C</b> <b>C</b> <b>Q</b> <b>C</b> RKPPPAKT | 4334.2                                          | 4328.2                                           | 4332.22                                               |
| Linearised | GIGDPVTS <b>L</b> KSGAIS <b>H</b> PVFS <b>P</b> RR<br>YKQIGTS <b>G</b> LPGTK <b>S</b> S <b>K</b> KP                                | 4237.82                                         | 4237.82                                          | 4237.7                                                |

**Supplementary table S1. Theoretical masses of HBD2 peptides used**

Theoretical masses of various HBD2 peptide forms with oxidised or reduced cysteines, alongside the calculated observed masses from LC-MS analysis

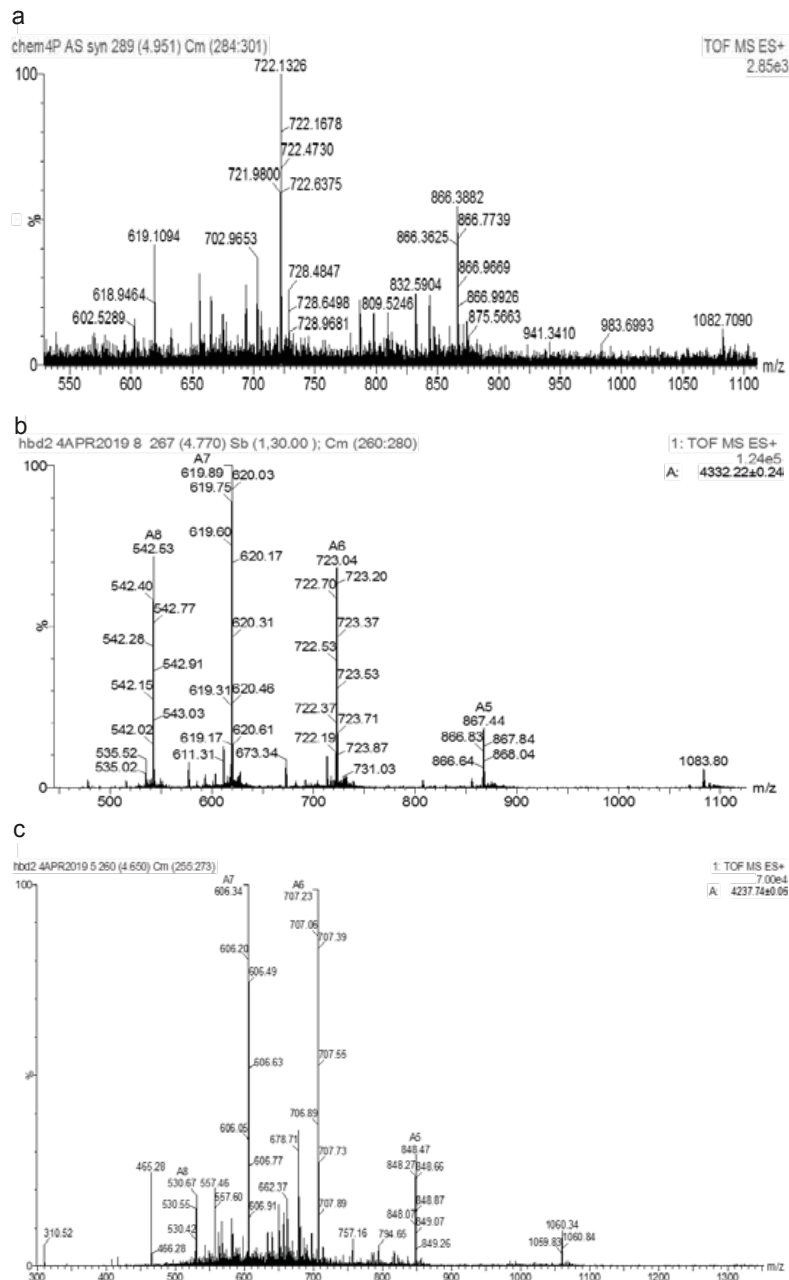

**Supplementary figure S2. LC-MS analysis of synthetic, scrambled and linearised HBD2**

(a-c) Accurate mass measurements of (b) synthetic, (c) scrambled and (d) linearised HBD2, performed by LC-MS. All peptides displayed a molecular mass consistent with the theoretical mass, given the known amino acid sequence. Synthetic HBD2 displayed a molecular mass consistent with the presence of 3 disulfide bonds. Scrambled HBD2 displayed a average mass consistent with a mix of oxidised forms of the peptide.

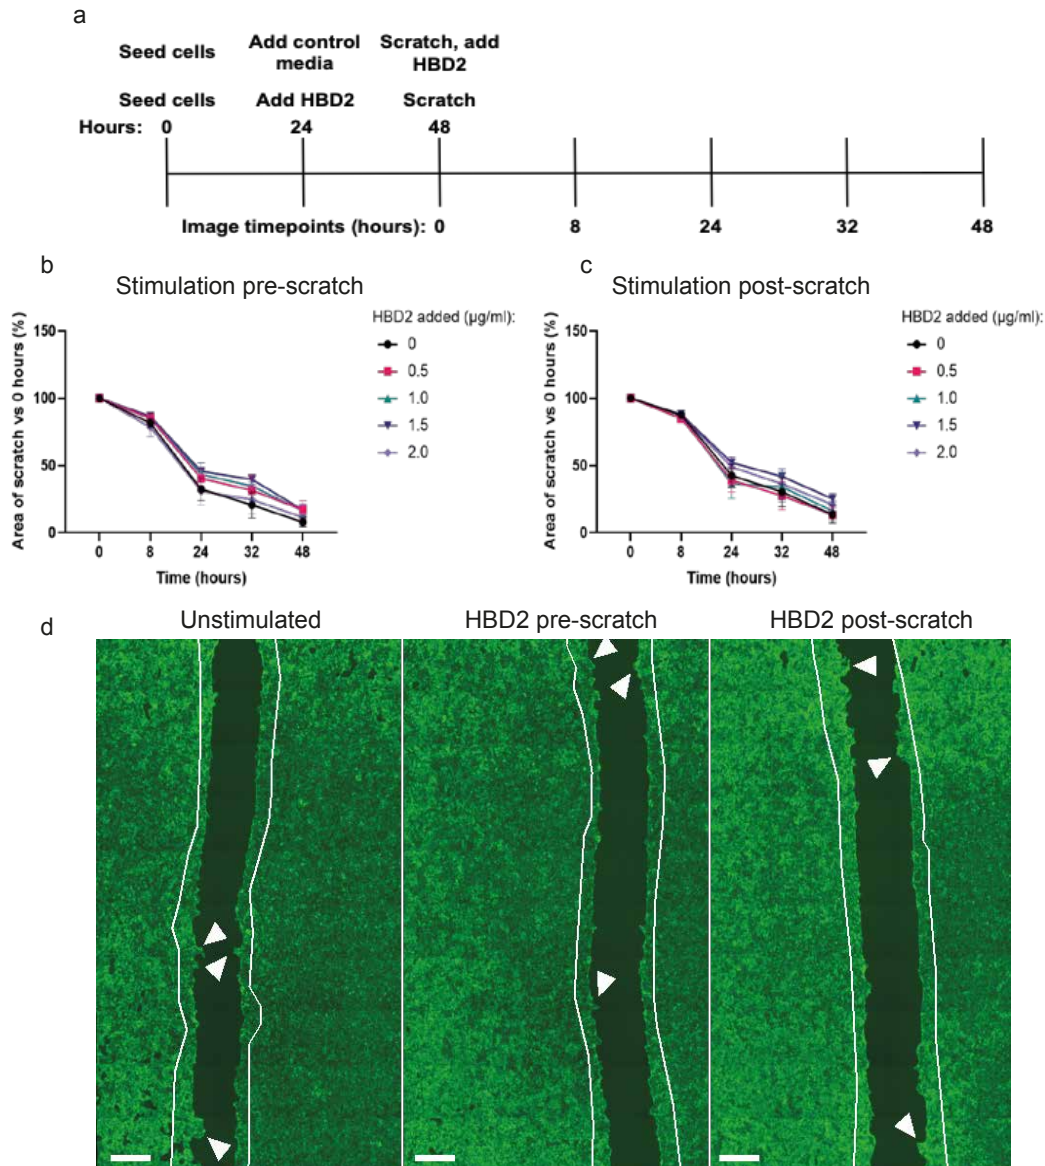

**Supplementary figure S3. HBD2 does not modulate HaCaT cell scratch wound healing**

(a) Timeline for scratch assays, indicating pre- and post-scratch stimulation and imaging timepoints.

(b-d) HaCaT cells seeded into 12-well plates were grown until confluency. 0.5  $\mu\text{g/ml}$  HBD2 was added at either 24 (stimulation pre-scratch) or 48-hours (stimulation post-scratch) after seeding. A p100 pipette tip was drawn vertically down the cell monolayer to introduce a 'wound' or 'scratch' at 48 hours post-seeding. The monolayer was immediately imaged (0-hour timepoint), with subsequent images taken at 8-, 24-, 32- and 48-hours post-scratch. Cells were incubated in serum-free media. (b+c) Data show the area of the scratch at each timepoint

as a percentage of the scratch area at the 0-hour timepoint. Each point represents mean  $\pm$  SEM for  $n = 5$ . (d) Representative images of scratch healing after 24 hours. Alexa488 Phalloidin stained fixed cell samples. Scale bar = 400  $\mu\text{m}$ . 60 images at 10x magnification taken per well, then stitched together. White lines indicate scratch border at 0-hours. Arrowheads indicate 'leading edge' migration of the cell monolayer.



(b-d) HaCaT cells were treated with 0.5 µg/ml synthetic TAMRA-labelled HBD2 or vehicle control. Peptide was added 24 hours after seeding cells and then washed off 24 hours later, or not washed off or not added until 48 hours after seeding cells (concurrently with V8). 5 µg/ml recombinant V8 was added for 24 hours before quantification of % monolayer damage from 5 random fields of view per condition per time point were imaged. (b) Data shown as mean ± SEM for n = 5. Statistical analysis by paired one-way ANOVA with RM multiple comparisons post-test. \*\* P < 0.01 \*\*\*\* P < 0.0001. (c) Representative images of TAMRA fluorescence for each condition. Scale bar represents 100 µm. (d) Total area of fluorescence (in pixels) was batch quantified using a Fiji macro (detailed in methods) for each field of view, at each time point in each condition. Average fluorescent area for the 5 fields of view in each replicate represented. Data shown as mean ± SEM for n=5. Statistical analysis by paired one-way ANOVA with RM multiple comparisons post-test.





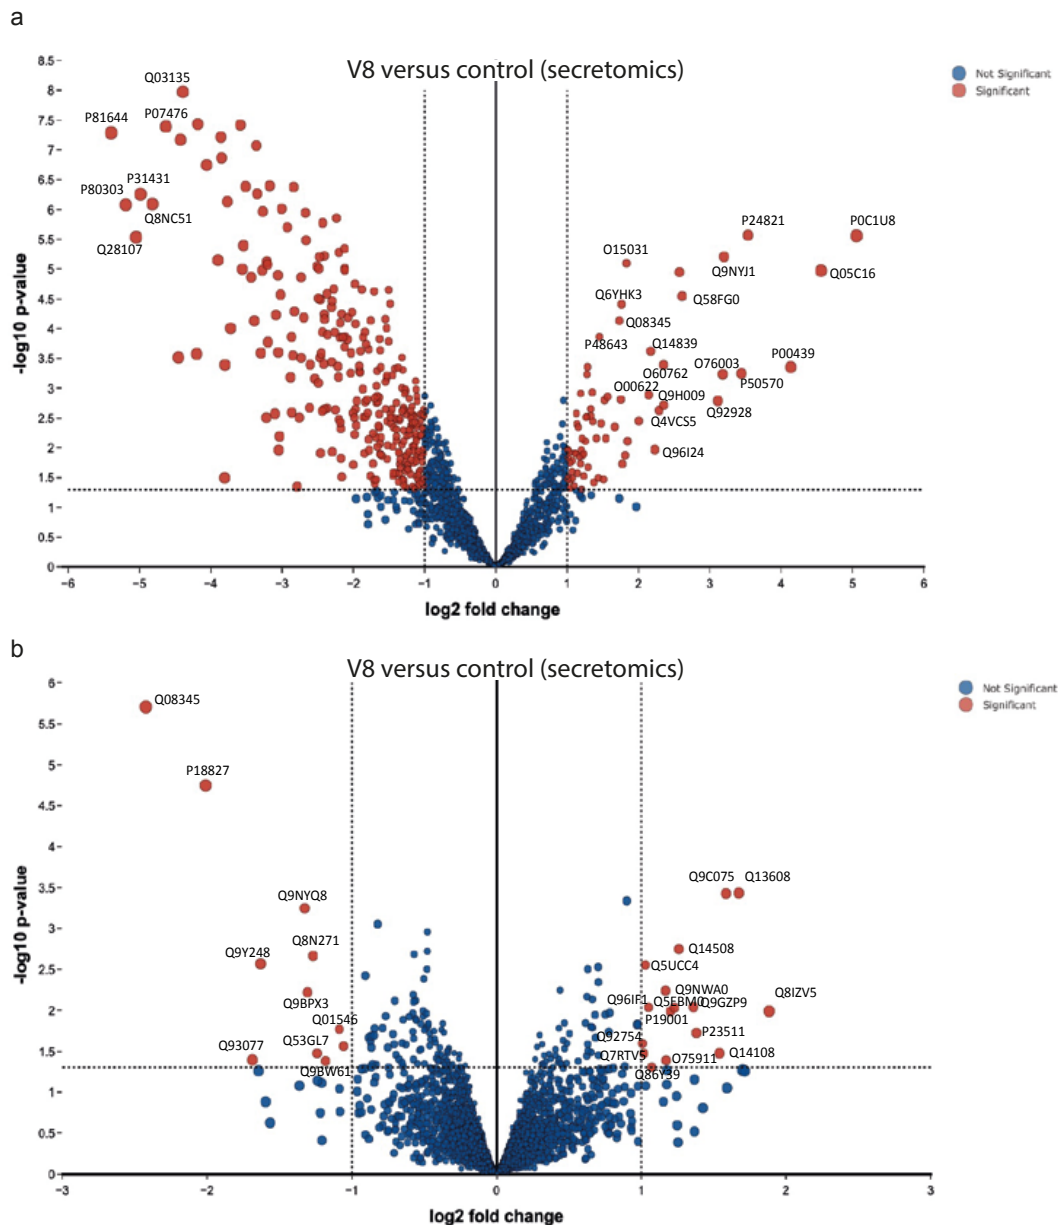

**Supplementary figure S6. Secretomic and proteomic analyses of “V8-alone”-damaged HaCaT cells**

HaCaT cell monolayers were treated with 5  $\mu\text{g/ml}$  V8 for 24 hours, 48 hours after seeding. Supernatants (a) and cells (b) were then collected, centrifuged at 3000 rpm for 5 minutes, and stored at  $-80\text{ }^{\circ}\text{C}$  prior to analysis. Data representative of  $n=5$ . Log fold changes and p values generated using LIMMA pathway<sup>37</sup>.

(a) Volcano plot generated from secretomics analysis of V8-stimulated HaCaT cells compared to control vehicle-treated cells. Red points indicate significant points, blue indicate nonsignificant points.

(b) Volcano plot generated proteomics analysis of V8-stimulated HaCaT cells compared to control vehicle-treated cells. Red points indicate significant points, blue indicate nonsignificant points.

| <b>Protein code</b> | <b>Gene</b> | <b>Log2 fold change</b> | <b>p.mod</b> | <b>Protein name</b>                                           |
|---------------------|-------------|-------------------------|--------------|---------------------------------------------------------------|
| P0C1U8              | SSPA        | 5.05                    | 0.00         | Glutamyl endopeptidase                                        |
| Q05C16              | LRRC63      | 4.56                    | 0.00         | Leucine-rich repeat-containing protein 63                     |
| P00439              | PAH         | 4.13                    | 0.00         | Phenylalanine-4-hydroxylase                                   |
| P24821              | TNC         | 3.53                    | 0.00         | Tenascin                                                      |
| P50570              | DNM2        | 3.44                    | 0.00         | Dynamin-2                                                     |
| Q9NYJ1              | COA4        | 3.20                    | 0.00         | Cytochrome c oxidase assembly factor 4 homolog, mitochondrial |
| O76003              | GLRX3       | 3.18                    | 0.00         | Glutaredoxin-3                                                |
| Q9H0U4              | RAB1B       | 3.11                    | 0.00         | Putative Ras-related protein Rab-1C                           |
| Q58FG0              | HSP90AA5P   | 2.61                    | 0.00         | Putative heat shock protein HSP 90-alpha A5                   |
| Q9H009              | NACA2       | 2.35                    | 0.00         | Nascent polypeptide-associated complex subunit alpha-2        |
| O60762              | DPM1        | 2.35                    | 0.00         | Dolichol-phosphate mannosyltransferase subunit 1              |
| Q4VCS5              | AMOT        | 2.29                    | 0.00         | Angiomotin                                                    |
| Q96I24              | FUBP3       | 2.23                    | 0.01         | Far upstream element-binding protein 3                        |
| Q14839              | CHD4;CHD5   | 2.17                    | 0.00         | Chromodomain-helicase-DNA-binding protein 4                   |
| O00622              | CCN1        | 2.14                    | 0.00         | CCN family member 1                                           |
| O15031              | PLXNB2      | 1.83                    | 0.00         | Plexin-B2                                                     |
| Q6YHK3              | CD109       | 1.76                    | 0.00         | CD109 antigen                                                 |
| Q08345              | DDR1        | 1.73                    | 0.00         | Epithelial discoidin domain-containing receptor 1             |
| P48643              | CCT5        | 1.45                    | 0.00         | T-complex protein 1 subunit epsilon                           |
| Q9BRK5              | SDF4        | -2.83                   | 0.00         | 45 kDa calcium-binding protein                                |

|        |            |       |      |                                                       |
|--------|------------|-------|------|-------------------------------------------------------|
| Q8WVN6 | SECTM1     | -3.17 | 0.00 | Secreted and transmembrane protein 1                  |
| B4E1Z4 | CFB        | -3.30 | 0.00 | Complement factor B                                   |
| Q32MZ4 | LRRFIP1    | -3.35 | 0.00 | Leucine-rich repeat flightless-interacting protein 1  |
| Q14847 | LASP1      | -3.36 | 0.00 | LIM and SH3 domain protein 1                          |
| Q86UP2 | KTN1       | -3.39 | 0.00 | Kinectin                                              |
| O75635 | SERPINB7   | -3.43 | 0.00 | Serpin B7                                             |
| Q7Z406 | MYH14      | -3.51 | 0.00 | Myosin-14                                             |
| P04156 | PRNP       | -3.54 | 0.00 | Major prion protein                                   |
| P26038 | MSN        | -3.56 | 0.00 | Moesin                                                |
| Q15056 | EIF4H      | -3.58 | 0.00 | Eukaryotic translation initiation factor 4H           |
| P62328 | TMSB4X     | -3.72 | 0.00 | Thymosin beta-4                                       |
| O76070 | SNCG       | -3.77 | 0.00 | Gamma-synuclein                                       |
| Q86TE4 | LUZP2      | -3.80 | 0.00 | Leucine zipper protein 2                              |
| P02777 | Bovine PF4 | -3.80 | 0.03 | Bovine Platelet factor 4                              |
| Q02818 | NUCB1      | -3.85 | 0.00 | Nucleobindin-1                                        |
| P51858 | HDGF       | -3.86 | 0.00 | Hepatoma-derived growth factor                        |
| O75821 | EIF3G      | -3.90 | 0.00 | Eukaryotic translation initiation factor 3 subunit G  |
| P51572 | BCAP31     | -4.06 | 0.00 | B-cell receptor-associated protein 31                 |
| Q00688 | FKBP3      | -4.18 | 0.00 | Peptidyl-prolyl cis-trans isomerase FKBP3             |
| Q9HB71 | CACYBP     | -4.20 | 0.00 | Calcyclin-binding protein                             |
| Q03135 | CAV1       | -4.39 | 0.00 | Caveolin-1                                            |
| P35241 | RDX        | -4.42 | 0.00 | Radixin                                               |
| P06753 | TPM3       | -4.45 | 0.00 | Tropomyosin alpha-3 chain                             |
| P07476 | IVL        | -4.63 | 0.00 | Involucrin                                            |
| Q8NC51 | SERBP1     | -4.82 | 0.00 | Plasminogen activator inhibitor 1 RNA-binding protein |

|        |              |       |      |                            |
|--------|--------------|-------|------|----------------------------|
| P31431 | SDC4         | -4.98 | 0.00 | Syndecan-4                 |
| Q28107 | Bovine F5    | -5.04 | 0.00 | Coagulation factor V       |
| P80303 | NUCB2        | -5.19 | 0.00 | Nucleobindin-2             |
| P81644 | Bovine APOA2 | -5.40 | 0.00 | Bovine Apolipoprotein A-II |

**Supplementary table S2. Secretomic analysis from “V8-only” conditions**

HaCaT cell monolayers were treated with 5 µg/ml V8 for 24 hours, 48 hours after seeding. Supernatants were then collected, centrifuged at 3000 rpm for 5 minutes and stored at -80 °C prior to analysis. n=5 per condition. Log fold changes and p values generated using LIMMA pathway<sup>37</sup>. Table shows proteins with the greatest differences in detection levels between control and V8 treated conditions, largest to smallest, with Uniprot protein code, gene code, fold change, p.mod value, protein name and brief description of function. Protein descriptions made using UniProt database information<sup>39</sup>.

| Protein code | Gene         | Log2 fold change | p.mod | Protein name                                                  |
|--------------|--------------|------------------|-------|---------------------------------------------------------------|
| Q8IZV5       | RDH10        | 1.88             | 0.01  | Retinol dehydrogenase 10                                      |
| Q13608       | PEX6         | 1.67             | 0.00  | Peroxisome assembly factor 2                                  |
| Q9C075       | KRT23        | 1.58             | 0.00  | Keratin, type I cytoskeletal 23                               |
| Q14108       | SCARB2       | 1.54             | 0.03  | Lysosome membrane protein 2                                   |
| P23511       | NFYA         | 1.38             | 0.02  | Nuclear transcription factor Y subunit alpha                  |
| Q14508       | WFDC2        | 1.26             | 0.00  | WAP four-disulfide core domain protein 2                      |
| Q9GZP9       | DERL2        | 1.36             | 0.01  | Derlin-2                                                      |
| Q5EBM0       | CMPK2        | 1.23             | 0.01  | UMP-CMP kinase 2, mitochondrial                               |
| P19001       | Murine KRT19 | 1.20             | 0.01  | Murine Keratin, type I cytoskeletal 19                        |
| O75911       | DHRS3        | 1.17             | 0.04  | Short-chain dehydrogenase/reductase 3                         |
| Q9NWA0       | MED9         | 1.17             | 0.01  | Mediator of RNA polymerase II transcription subunit 9         |
| Q86Y39       | NDUFA11      | 1.07             | 0.05  | NADH dehydrogenase [ubiquinone] 1 alpha subcomplex subunit 11 |
| Q96IF1       | AJUBA        | 1.05             | 0.01  | LIM domain-containing protein ajuba                           |
| Q5UCC4       | EMC10        | 1.03             | 0.00  | ER membrane protein complex subunit 10                        |
| Q7RTV5       | AAED1        | 1.02             | 0.03  | Peroxiredoxin-like 2C                                         |
| Q92754       | TFAP2C       | 1.01             | 0.03  | Transcription factor AP-2 gamma                               |
| Q93077       | HIST1H2AC    | -1.69            | 0.04  | Histone H2A type 1-C                                          |
| P18827       | SDC1         | -2.01            | 0.00  | Syndecan-1                                                    |
| Q08345       | DDR1         | -2.42            | 0.00  | Epithelial discoidin domain-containing receptor 1             |
| Q9Y248       | GINS2        | -1.63            | 0.00  | DNA replication complex GINS protein PSF2                     |
| Q8N271       | PROM2        | -1.27            | 0.00  | Prominin-2                                                    |
| Q9BPX3       | NCAPG        | -1.31            | 0.01  | Condensin complex subunit 3                                   |

|        |        |       |      |                                            |
|--------|--------|-------|------|--------------------------------------------|
| Q9NYQ8 | FAT2   | -1.33 | 0.00 | Protocadherin Fat 2                        |
| Q53GL7 | PARP10 | -1.24 | 0.03 | Protein mono-ADP-ribosyltransferase PARP10 |
| Q01546 | KRT76  | -1.09 | 0.02 | Keratin, type II cytoskeletal 2 oral       |
| Q9BW61 | DDA1   | -1.18 | 0.04 | DET1- and DDB1-associated protein 1        |
| Q6YHK3 | CD109  | -1.06 | 0.03 | CD109 antigen                              |

### Supplementary table S3. Proteomic analysis of V8-damaged cells

HaCaT cell monolayers were treated with 5 µg/ml V8 for 24 hours, 48 hours after seeding. The cells were then washed rigorously with PBS and scraped from the well surface. The cell pellet was washed an additional three times with PBS in suspension. Dry cell pellet stored at -80 °C prior to analysis. n=5 per condition. Log fold changes and p values generated using LIMMA pathway<sup>37</sup>. Table shows proteins with the greatest differences in detection levels between control and V8 treated conditions, largest to smallest, with Uniprot protein code, gene code, fold change, p.mod value, protein name and brief description of function. Protein descriptions made using UniProt database information<sup>39</sup>.
